# Supplementary material
Source: PubMed Central journal article supplement (PMC6177616)
Supplement: BPH-175-4167-s001.pdf [file BPH-175-4167-s001.pdf]

## **ONLINE DATA SUPPLEMENTS**

**Successful treatment of established heart failure in mice with  
recombinant HDL (Milano)**

## SUPPLEMENTAL FIGURES

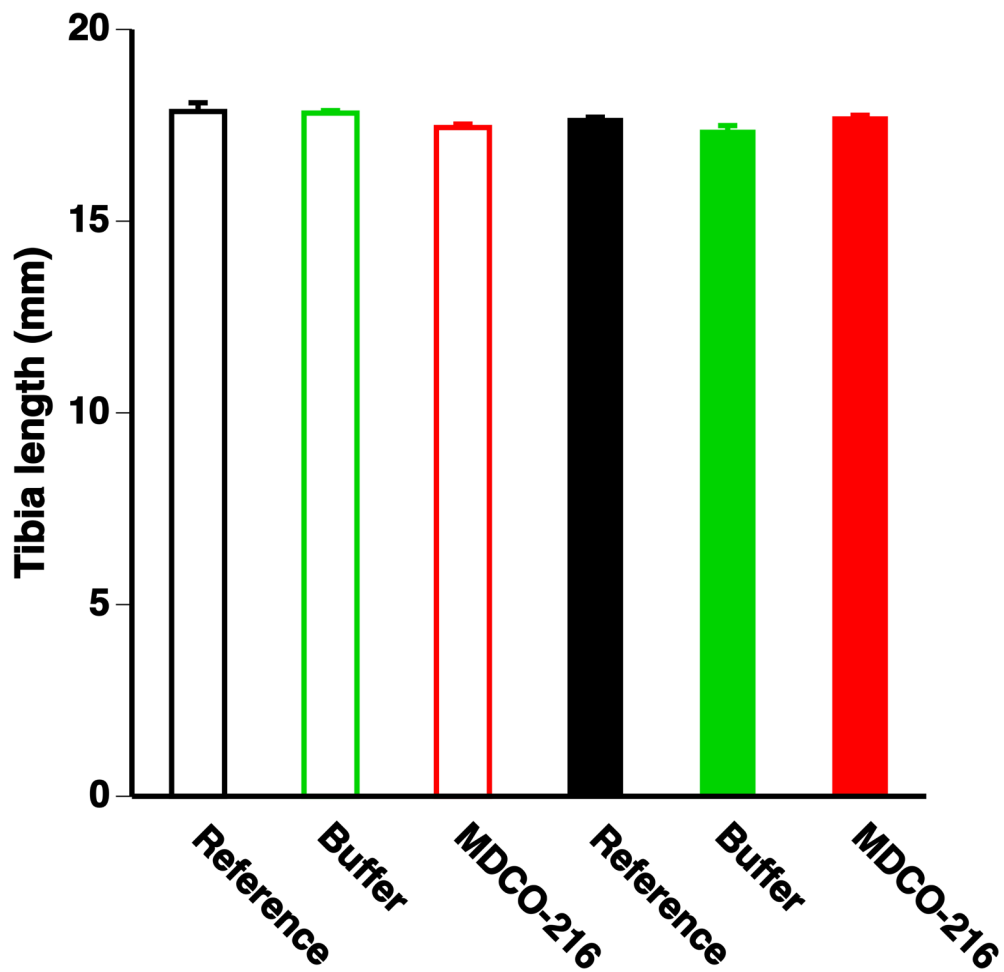

**Supplemental Figure 1. Tibia length in C57BL/6 sham mice and in C57BL/6 TAC mice.** Data reflect measurements at day 56 (reference mice) and at day 65 (buffer mice and MDCO-216 mice) after sham operation (n=10 for reference mice, n=11 for buffer mice, n=11 for MDCO-216 mice) or TAC (n=12 for reference mice, n=12 for buffer mice, n=10 for MDCO-216 mice). Sham mice and TAC mice are indicated by open bars and closed bars, respectively.

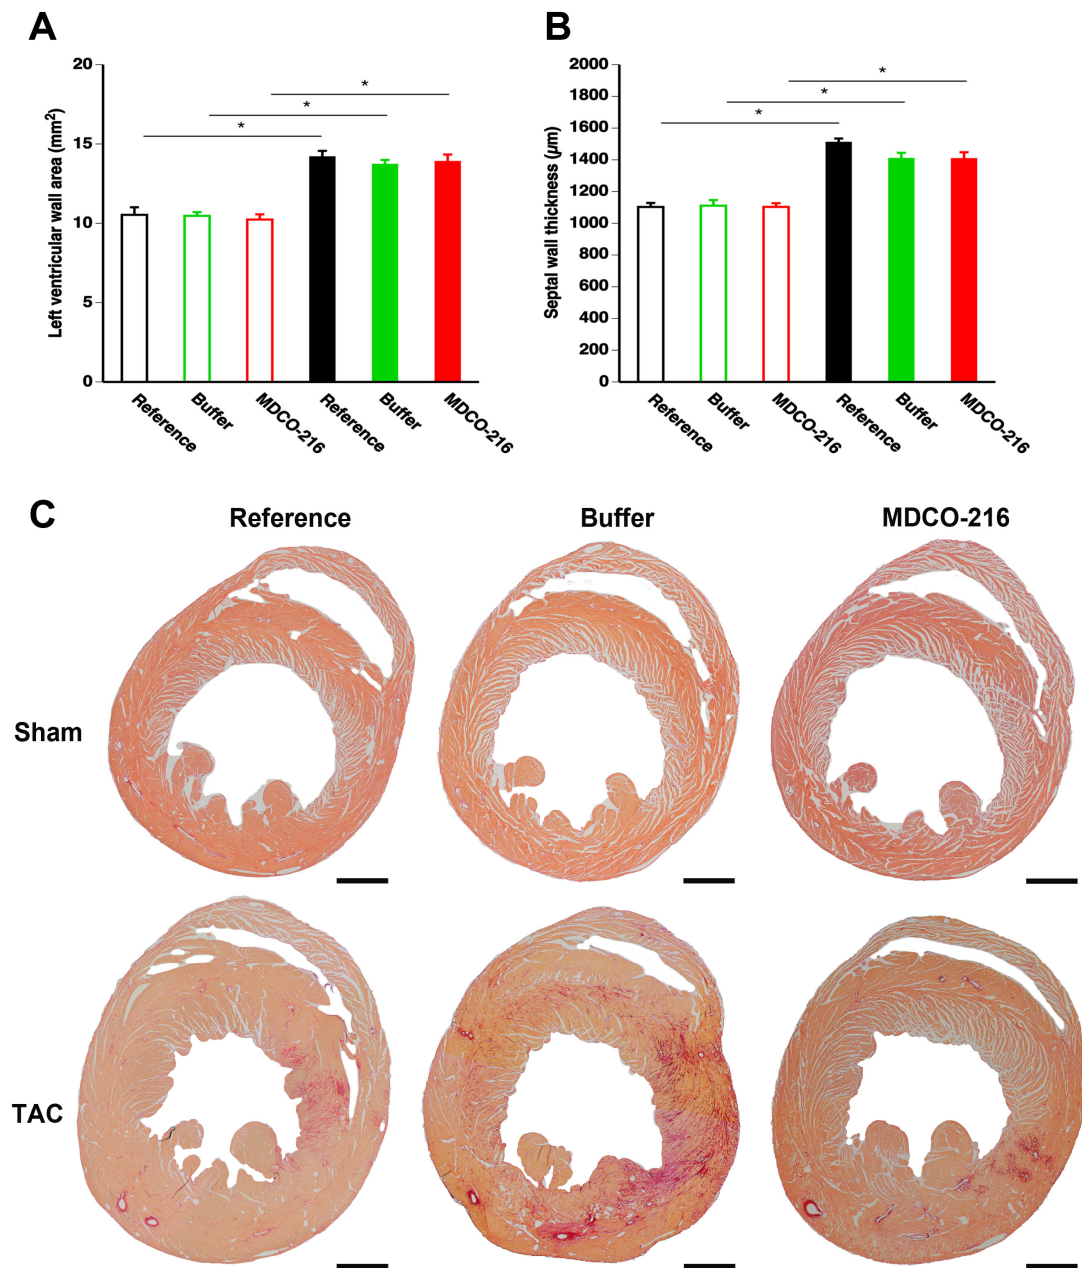

**Supplemental Figure 2. TAC induces left ventricular hypertrophy.** Bar graphs showing the left ventricular wall area (A) and septal wall thickness (B) in reference sham mice (n=11), buffer sham mice (n=12), MDCO-216 sham mice (n=10), reference TAC mice (n=21), buffer TAC mice (n=17), and MDCO-216 TAC mice (n=21) at day 56 (reference mice) and at day 65 (buffer mice and MDCO-216 mice) after sham or TAC operation. Sham mice and TAC mice are indicated by open bars and closed bars, respectively. All data represent means  $\pm$  SEM. \*:  $p < 0.05$ . Panel C shows representative Sirius red-stained cross-sections of sham hearts and TAC hearts. Scale bar represents 1 mm.

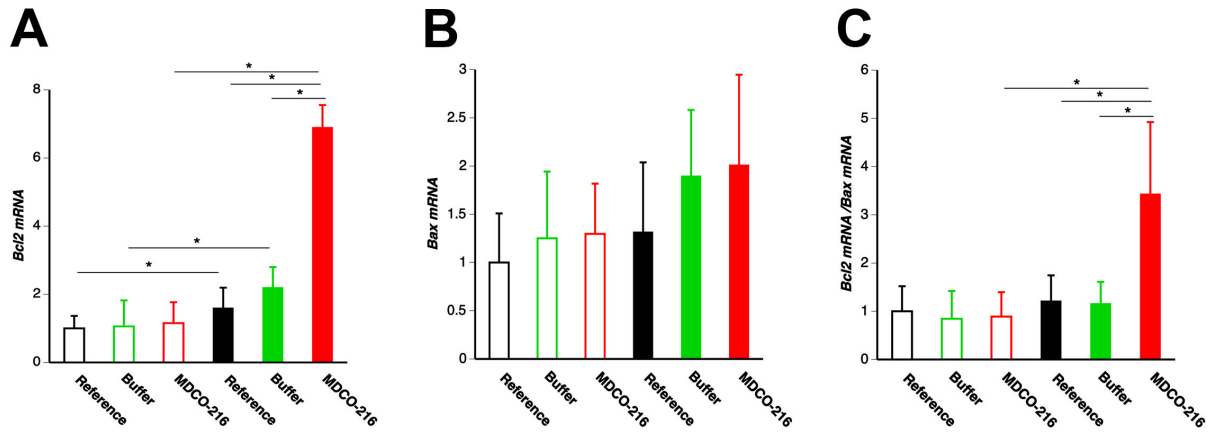

**Supplemental Figure 3. Myocardial mRNA levels of apoptotic markers.** Bar graphs showing normalized myocardial mRNA levels of *Bcl2* (A) and *Bax* (B) quantified by RT-qPCR. The *Bcl2 mRNA/Bax mRNA* ratio is shown in panel C. Data are expressed as geometric means  $\pm$  geometric standard error (n=8). \*: p<0.05.

## SUPPLEMENTAL TABLES

**Supplemental Table 1. Primers and probe sequences for real-time quantitative reverse transcription PCR.**

| Gene          | Assay ID            | Primer 1                 | Primer 2                | Probe                        |
|---------------|---------------------|--------------------------|-------------------------|------------------------------|
| <i>Bcl2</i>   | Mm.PT.58.7362966    | CCAGGAGAAATCAAACAGAGGT   | GATGACTGAGTACCTGAACCG   | CAGGATAACGGAGGCTGGGATGC      |
| <i>Bax</i>    | Mm.PT.58.14012210   | GCCATCAGCAAACATGTCAG     | GGAGATGAACTGGACAGCAAT   | CGTCAGCAATCATCCTCTGCAGCT     |
| <i>Nppa</i>   | Mm.PT.58.12973594.g | CTCCTTGGCTGTTATCTTCGG    | GGGTAGGATTGACAGGATTGG   | CCAGAGTGGACTAGGCTGCAACAG     |
| <i>Nppb</i>   | Mm.PT.58.8584045.g  | CTTCTACAACAACCTCAGTGC    | AGGTGACACATATCTCAAGCTG  | CGATCCGGTCTATCTTGTGCCA       |
| <i>Myh6</i>   | Mm.PT.58.31314128   | AAGTAGAGCTTCATCCATGGC    | GCGCATTGAGTTCAAGAAGATAG | TGAAGGCCCGAATGTTCCACTGG      |
| <i>Myh7</i>   | Mm.PT.58.17465550.g | CTGGTGAGGTCATTGACAGAA    | CAACATGGAGCAGATCATCAAG  | AAGACCAGATGAATGAGCACCGGAG    |
| <i>Col1a1</i> | Mm.PT.58.7562513    | CATTGTGTATGCAGCTGACTTC   | CGCAAAGAGTCTACATGTCTAGG | CCGGAGGTCCACAAAGCTGAACA      |
| <i>Col3a1</i> | Mm.PT.58.13848686   | TCTCTAGACTCATAGGACTGACC  | TTCTTCTCACCTTCTTCATCC   | CATCTACGTTGGACTGCTGTGCCA     |
| <i>Mmp2</i>   | Mm.PT.58.9606100    | AACTTCACGCTCTTGAGACTT    | GAATGCCATCCCTGATAACCT   | CACCCTTGAAGAAGTAGCTATGACCACC |
| <i>Mmp9</i>   | Mm.PT.58.10100097   | GTGGGAGGTATAGTGGGACA     | GACATAGACGGCATCCAGTATC  | TCGGCTGTGGTTCAGTTGTGGT       |
| <i>Flt1</i>   | Mm.PT.58.43852013   | AGGTCGTAGAGCCACTGAT      | CAGAGCCAGGAACATATACACA  | CTCGTTAGAGATTCGGAAGCGCCA     |
| <i>Kdr</i>    | Mm.PT.58.5869721    | GGATCTTGAGTTCAGACATGAGG  | GGAATTGACAAGACAGCGACT   | AAGAAGGAGCAACACACAGCGAGC     |
| <i>Cdh5</i>   | Mm.PT.58.8747496    | TGGTCTTGCGGATGGAGTA      | CAGCGACACTTCTACCACTTC   | AGCGGTTTCTTCTGGTTTTCTGGC     |
| <i>Tuba1a</i> | Mm.PT.58.13069923   | TCTTGTCACCTGGCATCTGG     | CGCGAAGCAGCAACCAT       | CATGTTCCAGGCAGTAGAGCTCCC     |
| <i>Gapdh</i>  | Mm.PT.39a.1         | GTGGAGTCATACTGGAACATGTAG | AATGGTGAAGGTCGGTGTG     | TGCAAATGGCAGCCCTGGTG         |
| <i>Eef1e1</i> | Mm.PT.56a.17175143  | TGACTAGATGGGTGGCGAT      | GGGAATAAGTACAGTGCTCAGG  | AGCGGCAGATTCCAGTTCTACAGAC    |

**Supplemental Table 2. Total, non-HDL, HDL cholesterol, and triglyceride plasma levels in C57BL/6 mice at time of sacrifice.**

|                     | <b>Reference sham</b> | <b>Buffer sham</b> | <b>MDCO-216</b> | <b>Reference TAC</b> | <b>Buffer TAC</b> | <b>MDCO-216 TAC</b>        |
|---------------------|-----------------------|--------------------|-----------------|----------------------|-------------------|----------------------------|
| Number of mice      | 8                     | 8                  | 8               | 8                    | 8                 | 8                          |
| Total cholesterol   | 1.71 ± 0.09           | 1.91 ± 0.13        | 1.85 ± 0.13     | 1.73 ± 0.11          | 1.86 ± 0.11       | 1.83 ± 0.16                |
| Non-HDL cholesterol | 0.457 ± 0.048         | 0.503 ± 0.046      | 0.553 ± 0.057   | 0.530 ± 0.060        | 0.573 ± 0.055     | 0.453 ± 0.057              |
| HDL cholesterol     | 1.26 ± 0.09           | 1.41 ± 0.10        | 1.30 ± 0.13     | 1.20 ± 0.06          | 1.29 ± 0.07       | 1.38 ± 0.16                |
| Triglycerides       | 0.711 ± 0.105         | 0.782 ± 0.115      | 0.598 ± 0.072   | 1.06 ± 0.07          | 1.06 ± 0.15       | 0.995 ± 0.113 <sup>§</sup> |

Data are expressed in mmol/L and represent means + SEM. Reference mice were sacrificed at day 56 whereas buffer mice and MDCO-216 mice were sacrificed at day 65. §: p<0.05 versus respective sham group.
